# Supplementary material for: Conferring the Midas Touch on Integrative Taxonomy: A Nanogold-Oligonucleotide Conjugate-Based Quick Species Identification Tool
Source: Hindawi journal article supplement (doi:10.1155/2022/1009066), 2022-08-23
Supplement: f1 [file 1009066.f1.zip]

Archive with 2 entries (2 files):
- SUUPLIMENTARY FIGURE 1.JPG
- SUUPLIMENTARY FIGURE 2.JPG
