# Supplementary figures and images for: Conferring the Midas Touch on Integrative Taxonomy: A Nanogold-Oligonucleotide Conjugate-Based Quick Species Identification Tool
Source: Hindawi journal article supplement (doi:10.1155/2022/1009066), 2022-08-23

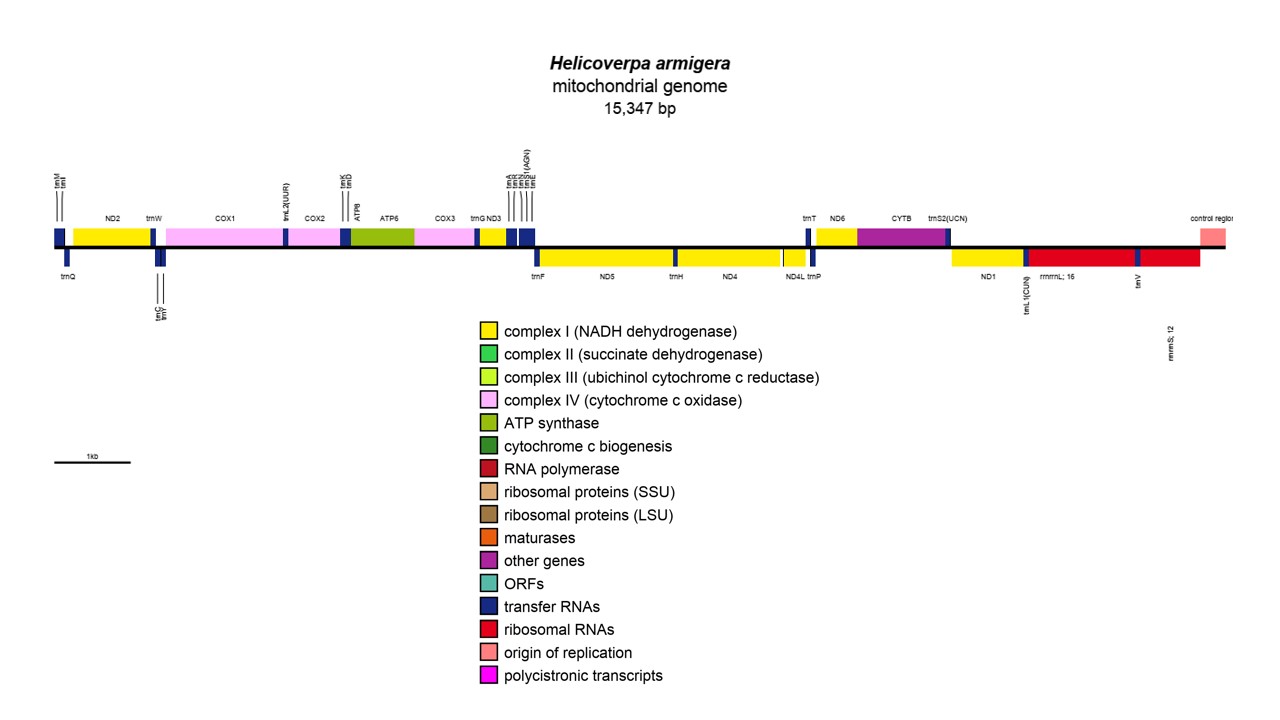

Supplement: f1 [file 1009066.f1.zip › SUUPLIMENTARY FIGURE 1.JPG]

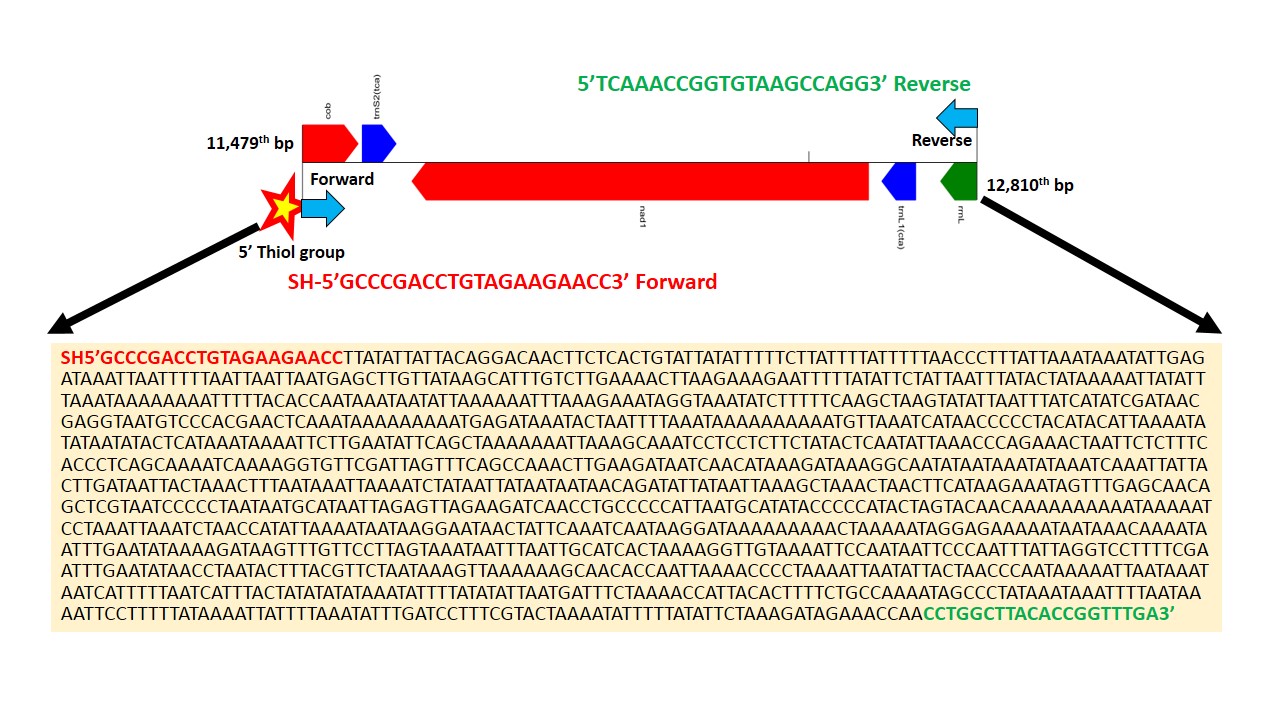

Supplement: f1 [file 1009066.f1.zip › SUUPLIMENTARY FIGURE 2.JPG]
